# Supplementary material for: Mitigating Co Metal Particle Agglomeration and Enhancing ORR Catalytic Activity through Nitrogen-Enriched Porous Carbon Derived from Biomass
Source: MDPI journal article supplement (doi:10.3390/catal13071118), 2023-07-18
Supplement: s1 [file s1]

---

## Supporting Information

Article

# Mitigating Co Metal Particle Agglomeration and Enhancing ORR Catalytic Activity through Nitrogen-Enriched Porous Carbon Derived from Biomass

Yanling Wu <sup>1</sup>, Qinggao Hou <sup>1,\*</sup>, Fangzhou Li <sup>1</sup>, Yuanhua Sang <sup>2</sup>, Mengyang Hao <sup>1</sup>, Xi Tang <sup>1</sup>,  
Fangyuan Qiu <sup>1</sup> and Haijun Zhang <sup>3,\*</sup>

<sup>1</sup> Jinan Key Laboratory of New Energy & New Materials for Intelligent Transportation, School of Civil Engineering, Shandong Jiaotong University, Jinan 250357, China; wuyanling621@163.com (Y.W.)

<sup>2</sup> State Key Laboratory of Crystal Materials, Shandong University, Jinan 250100, China; sangyh@sdu.edu.cn

<sup>3</sup> Department of Vascular & Intervention, Tenth Peoples' Hospital of Tongji University, Shanghai 200072, China

\* Correspondence: chqghou@163.com (Q.H.); zhanghaijun@tongji.edu.cn (H.Z.)

## Supplementary figures

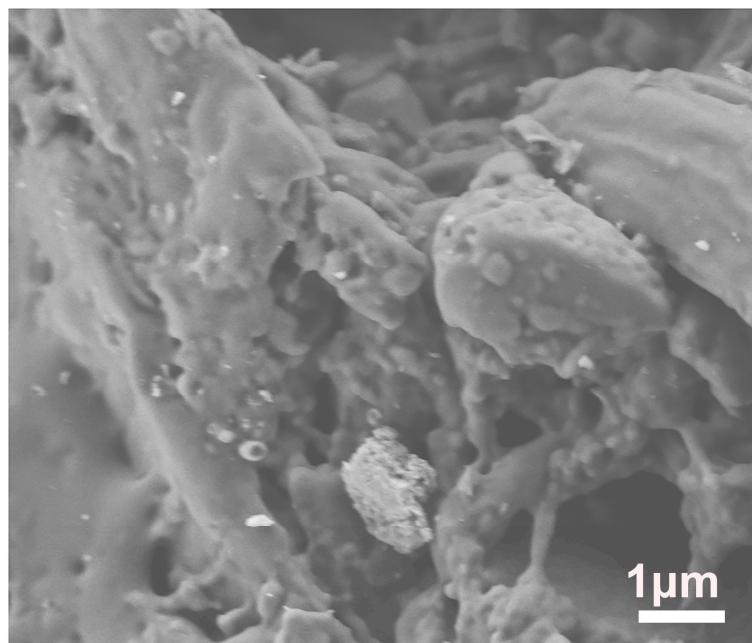

**Figure S1.** The SEM image of SP-C.

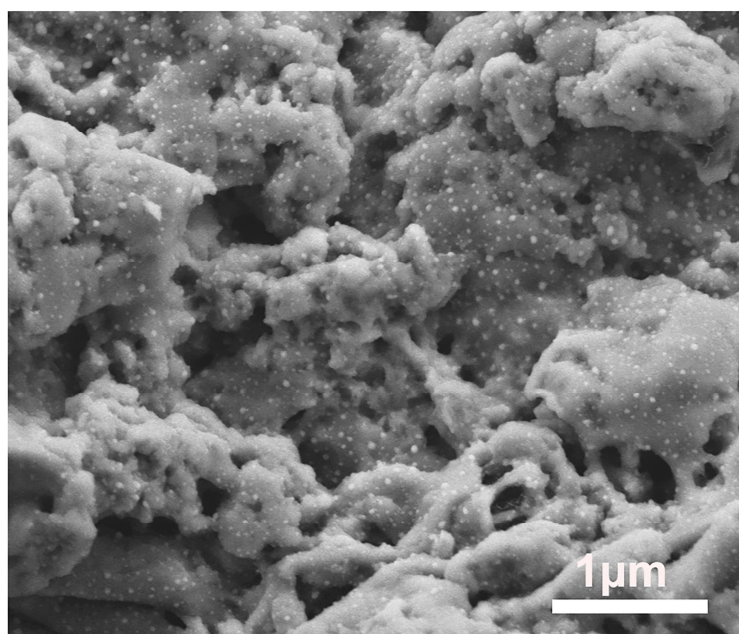

**Figure S2.** The SEM image of SP-C-a.

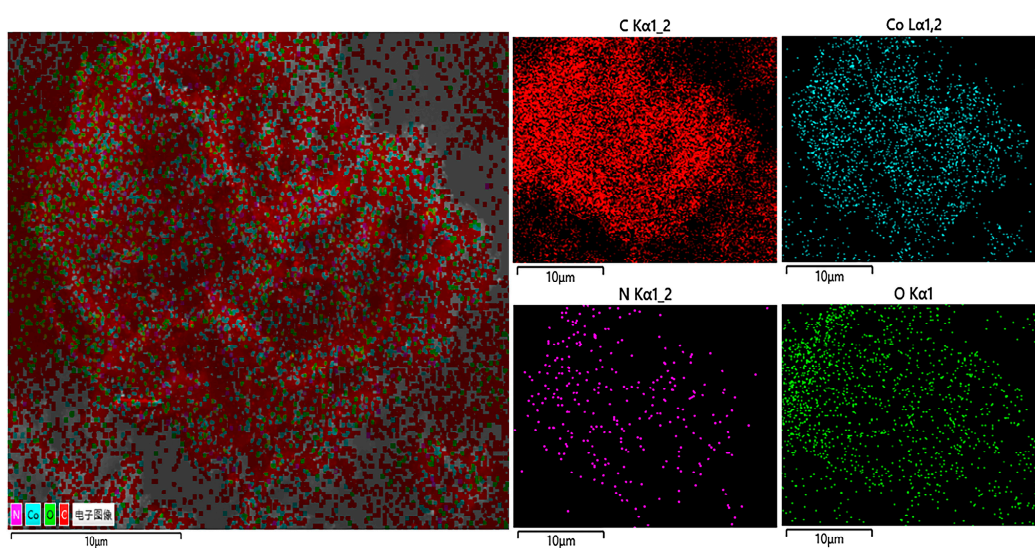

**Figure S3.** SEM image of Co@SP-C-a used in the EDS mapping area revealing the elemental distribution of Co, C, N, and O.

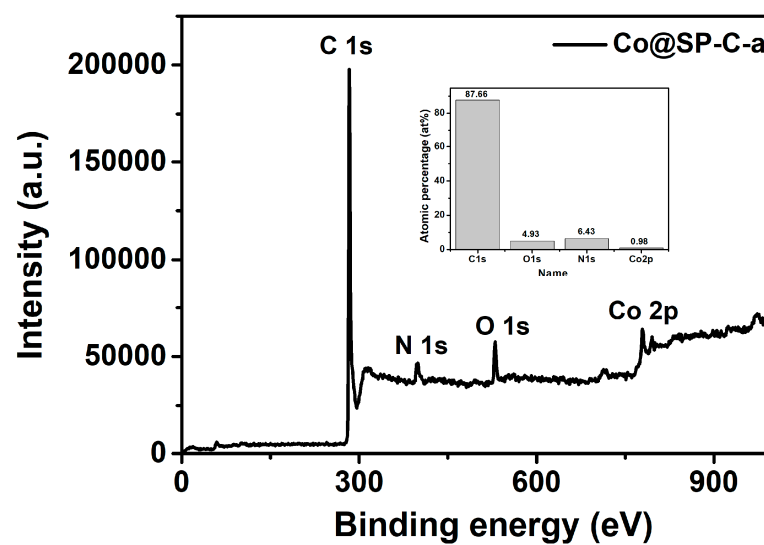

**Figure S4.** XPS survey spectra of Co@SP-C-a.

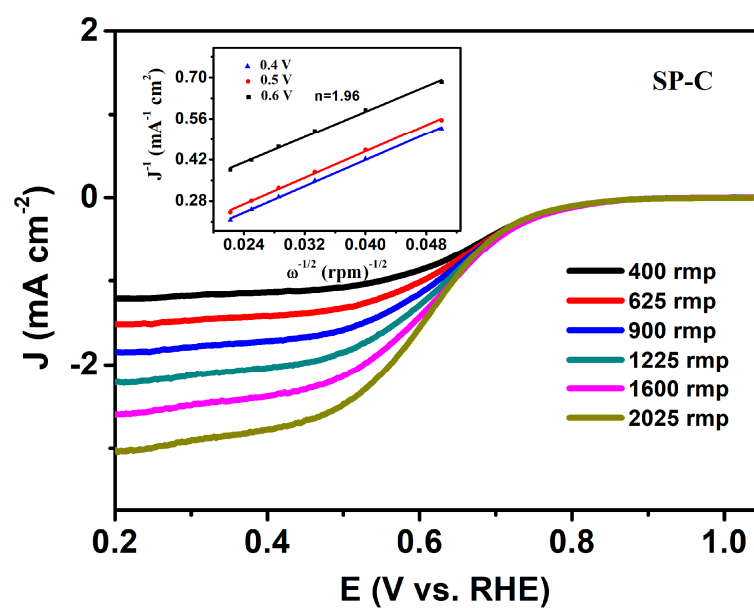

Figure S5. LSV curves of SP-C at various rotating speeds, respectively. (Inset: K-L plots of SP-C at various potentials.).

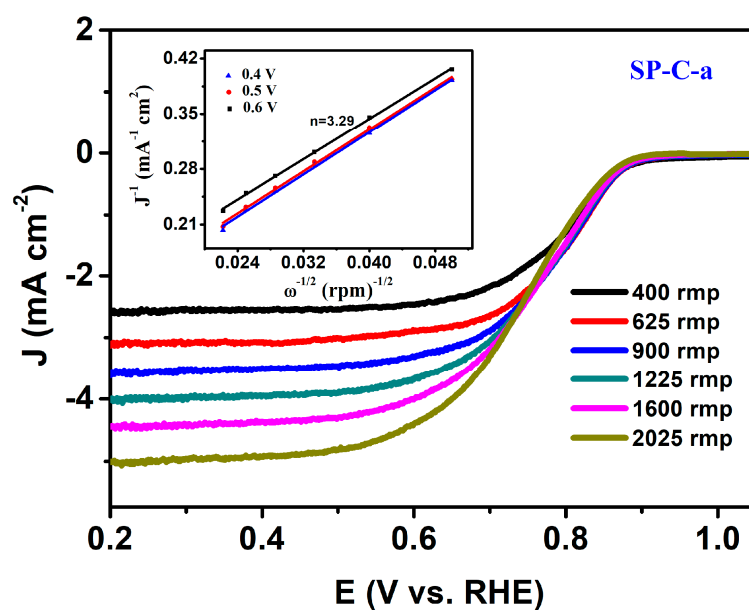

Figure S6. LSV curves of SP-C-a at various rotating speeds, respectively. (Inset: K-L plots of SP-C-a at various potentials.).



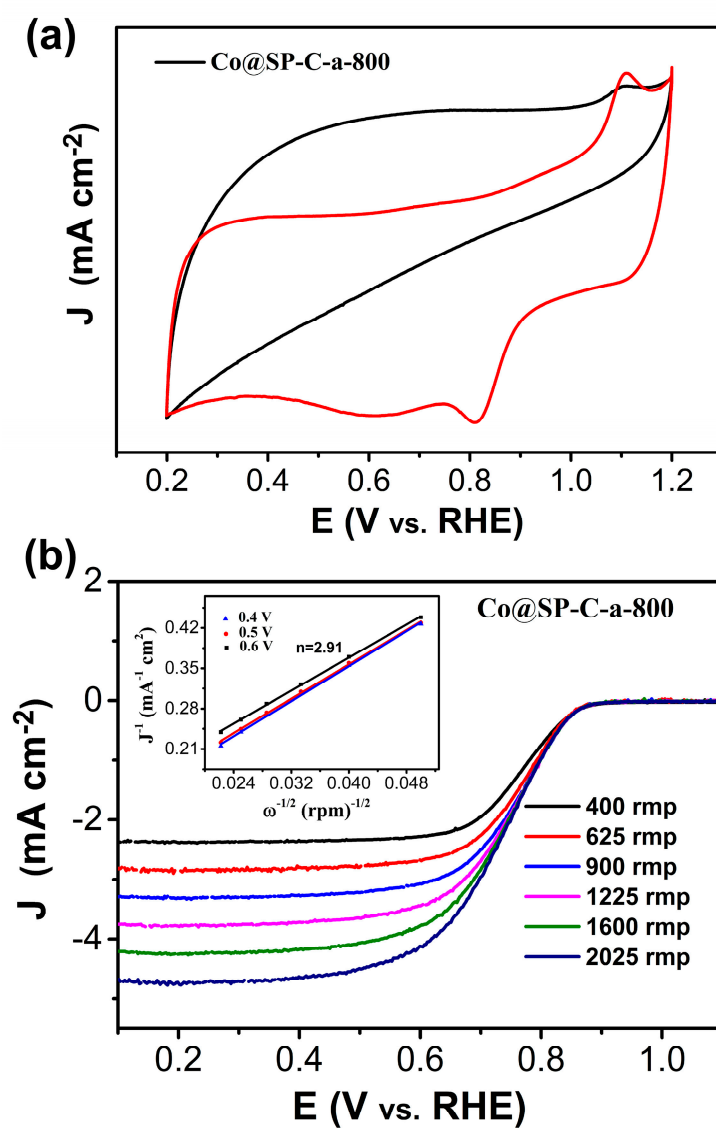

**Figure S7.** CV and LSV curves of SP-C-a-800 at various rotating speeds, respectively. (Inset: K–L plots of SP-C-a-800 at various potentials.).

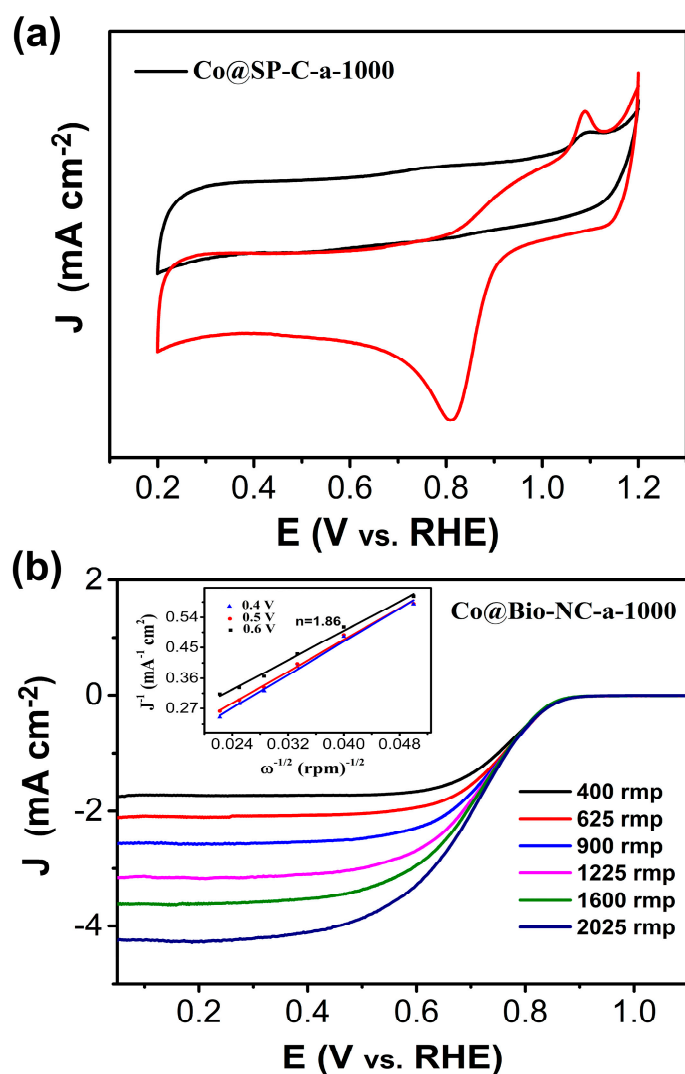

Figure S8. CV and LSV curves of SP-C-a-1000 at various rotating speeds, respectively. (Inset: K-L plots of SP-C-a-1000 at various potentials.).

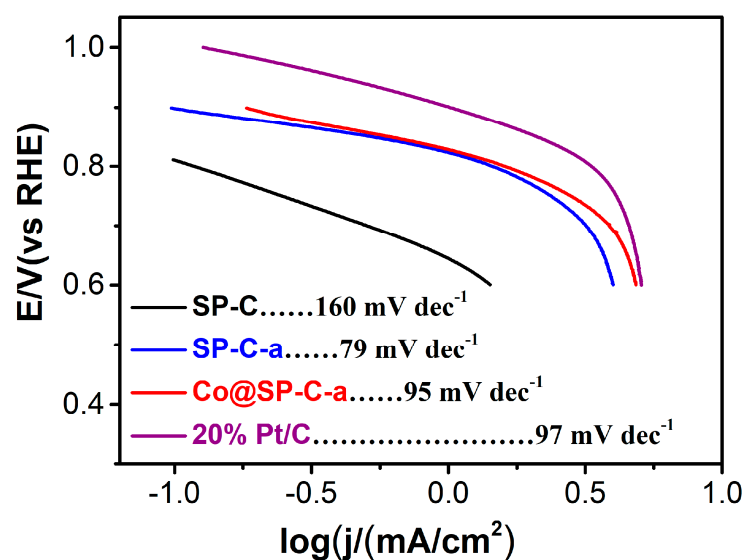

Figure S9. Tafel plots of SP-C, SP-C-a, Co@SP-C-a, and 20% Pt/C were obtained via LSV data.

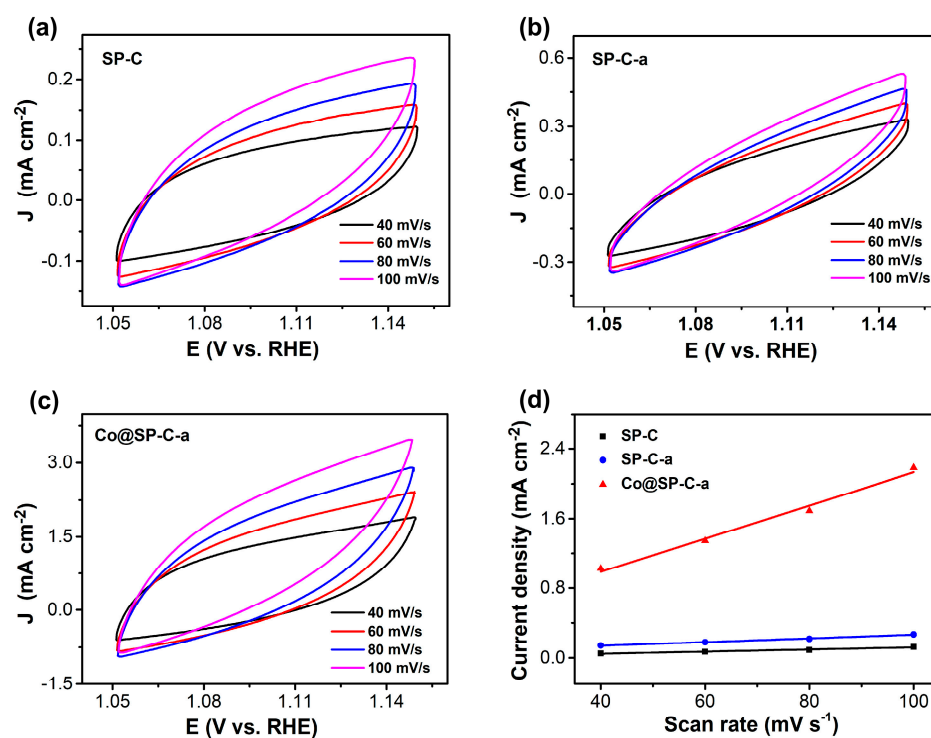

**Figure S10.** Cyclic voltammograms (CV) at various scan rates of (a) SP-C, (b) SP-C-a, and (c) Co@SP-C-a in 0.1 M KOH solution. (d) The electrochemical double-layer capacitance ( $C_{dl}$ ) of SP-C, SP-C-a, and Co@SP-C-a in 0.1 M KOH electrolyte.

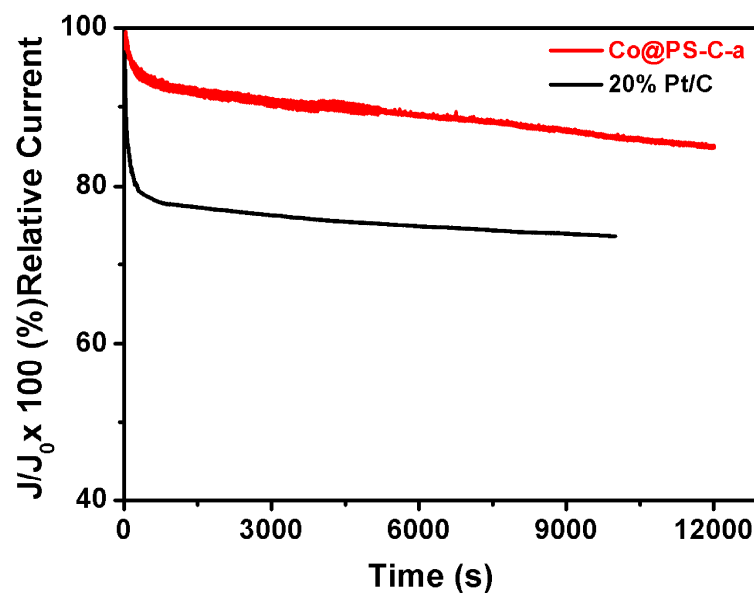

**Figure S11.** Amperometric  $i-t$  curves of Co@SP-C-a and 20 wt% Pt/C in  $O_2$ -saturated 0.1 M KOH solution with the rotation speed of 1600 rpm.

**Table S1.** The ORR performance of the SP-C, SP-C-a, Co@SP-C-a-800, Co@SP-C-a-1000, and Co@SP-C-a, in alkaline media at 1600 rpm, respectively.

| Sample         | $E_{\text{onset}}$ (V) | $E_{1/2}$ (V) | $J_L$ (mA cm <sup>-2</sup> ) | $n$  | Tafel (mV dec <sup>-1</sup> ) |
|----------------|------------------------|---------------|------------------------------|------|-------------------------------|
| SP-C           | 0.76                   | 0.57          | 2.58                         | 1.96 | 160                           |
| SP-C-a         | 0.86                   | 0.78          | 4.45                         | 3.29 | 75                            |
| Co@SP-C-a-800  | 0.87                   | 0.81          | 4.25                         | 2.91 | /                             |
| Co@SP-C-a-1000 | 0.85                   | 0.83          | 3.62                         | 1.86 | /                             |
| Co@SP-C-a      | 0.89                   | 0.81          | 6.13                         | 3.96 | 95                            |
| 20 wt% Pt/C    | 0.96                   | 0.86          | 5.61                         | 4.00 | 97                            |

**Table S2.** Comparison of the ORR performance for Co@SP-C-a catalysts at 1600 rpm in 0.1 M KOH.

| Catalysts                              | $E_{1/2}$ (V) | $J_L$ (mA cm <sup>-2</sup> ) | $E_{\text{onset}}$ (V) | Tafel slope (mV dec <sup>-1</sup> ) | $n$       | Reference                                                   |
|----------------------------------------|---------------|------------------------------|------------------------|-------------------------------------|-----------|-------------------------------------------------------------|
| Co@SP-C-a                              | 0.83          | 6.13                         | 0.89                   | --                                  | 3.96      | This work                                                   |
| Co@Co <sub>3</sub> O <sub>4</sub> @C   | 0.78          | 4.65                         | 0.90                   | --                                  | --        | <i>Energy Environ. Sci.</i> , 2015 [1]                      |
| Co@NG-acid                             | 0.83          | 4.00                         | 0.90                   | --                                  | 3.90      | <i>Adv. Funct. Mater.</i> , 2016 [2]                        |
| Co-NC@CoP-NC                           | 0.78          | 4.70                         | 0.89                   | --                                  | 3.97      | <i>J. Mater. Chem. A</i> , 2016 [3]                         |
| Co@Co <sub>3</sub> O <sub>4</sub> @PPD | 0.78          | 4.20                         | 0.90                   | --                                  | 3.78~3.96 | <i>Small</i> , 2016 [4]                                     |
| Co@NCNT                                | 0.83          | 6.20                         | 1.03                   | --                                  | --        | <i>J. Mater. Chem. A</i> , 2016 [5]                         |
| Co <sub>2</sub> N-CNF                  | 0.85          | 5.71                         | 0.92                   | 60                                  | 4.00      | <i>Adv. Mater.</i> , 2016 [6]                               |
| Cal-CoZIF-VXC72                        | 0.84          | 5.92                         | --                     | 35                                  | 4.00      | <i>Adv. Mater.</i> , 2017 [7]                               |
| Co <sub>3</sub> O <sub>4</sub> /Co-N-C | 0.91          | 5.10                         | 0.98                   | 68.5                                | 3.62      | <i>Journal of Power Sources</i> , 2017 [8]                  |
| Co/NPC                                 | 0.79          | 5.46                         | 0.91                   | --                                  | 3.85~4.00 | <i>J Mater Sci</i> , 2018 [9]                               |
| Co <sub>3</sub> O <sub>4</sub> /Co@N-G | 0.81          | 5.20                         | 0.96                   | --                                  | 3.91~3.96 | <i>J. Mater. Chem. A</i> , 2019 [10]                        |
| Co@NPC/C-MWCNTs)                       | 0.79          | 4.39                         | 0.87                   | 40.3                                | 3.51      | <i>Chemical Engineering Journal</i> , 2022 [11]             |
| Co@NCNTs-700-2                         | 0.81          | 7.4                          | 0.89                   | --                                  | 3.92~4.13 | <i>Journal of Alloys and Compounds</i> , 2022 [12]          |
| Co-ZIF <sub>x</sub> /CNF <sub>y</sub>  | 0.85          | 2.96                         | 0.93                   | --                                  | 4.00      | <i>Journal of Colloid and Interface Science</i> , 2023 [13] |
| Co@NC                                  | 0.895         | 4.6                          | --                     | 61                                  | 3.48      | <i>Journal of Electroanalytical Chemistry</i> , 2023 [14]   |

## References

1. Xia, W.; Zou, R.Q.; An, L.; Xia, D.G.; Guo, S.J. Metal-organic framework route to in-situ encapsulation of Co@Co<sub>3</sub>O<sub>4</sub>@C core@birell nanoparticles into highly ordered porous carbon matrix for oxygen reduction. *Energy Environ. Sci.* **2015**, *8*, 568–576.
2. Zeng, M.; Liu, Y.L.; Zhao, F.P.; Nie, K.Q.; Han, N.; Wang, X.X.; Huang, W.J.; Song, X.N.; Zhong, J.; Li, Y.G. Metallic cobalt nanoparticles encapsulated in nitrogen enriched graphene shells: Its bifunctional electrocatalysis and application in Zinc–Air batteries. *Adv. Funct. Mater.*, **2016**, *26*, 4397–4404.
3. Li, X.Y.; Jiang, Q.Q.; Dou, S.; Deng, L.B.; Huo, J.; Wang, S.Y. ZIF-67-derived Co-NC@CoP-NC nanopolyhedra as an efficient bifunctional oxygen electrocatalyst. *J. Mater. Chem. A*, **2016**, *4*, 15836–15840.
4. Wang, Z.; Li, B.; Ge, X.M.; Thomas Goh, F.W.; Zhang, X.; Du, G.J.; Wu, D.; Liu, Z.L.; Andy Hor, T.S.; Zhang, H.; et al. Co@Co<sub>3</sub>O<sub>4</sub>@PPD core@birell nanoparticle-based composite as an efficient electrocatalyst for oxygen reduction reaction. *Small* **2016**, *12*, 2580–2587.
5. Zhang, E.; Xie, Y.; Ci, S.Q.; Jia, J.C.; Cai, P.W.; Yi, L.C.; Wen, Z.H. Multifunctional high-activity and robust electrocatalyst derived from metal-organic frameworks. *J. Mater. Chem. A*, **2016**, *4*, 17288–17298.
6. Shang, L.; Yu, H.J.; Huang, X.; Bian, T.; Shi, R.; Zhao, Y.F.; Waterhouse, G.I.N.; Wu, L.Z.; Tung, C.H.; Zhang, T.R. Well-dispersed ZIF-derived Co,N-Co-doped carbon nanoframes through mesoporous-silica-protected calcination as efficient oxygen reduction electrocatalysts. *Adv. Mater.*, **2016**, *28*, 1668–1674.
7. Ni, B.; Ouyang, C.; Xu, X.B.; Zhuang, J.; Wang, X. Modifying commercial carbon with trace amounts of ZIF to prepare derivatives with superior ORR activities. *Adv. Mater.*, **2017**, *29*, 1701354.
8. Li, J.S.; Zhou, Z.; Liu, K.; Li, F.Z.; Peng, Z.G.; Tang, Y.G.; Wang, H.Y. Co<sub>3</sub>O<sub>4</sub>/Co-N-C modified ketjenblack carbon as an advanced electrocatalyst for Al-Air batteries. *J. Power Sources* **2017**, *343*, 30–38.
9. Zhan, T.R.; Lu, S.S.; Rong, H.Q.; Hou, W.G.; Teng, H.N.; Wen, Y.H. Metal-organic-framework-derived Co/nitrogen-doped porous carbon composite as an effective oxygen reduction electrocatalyst. *J. Mater. Sci.* **2018**, *53*, 6774–6784.
10. Guo, J.; Gadipelli, S.; Yang, Y.C.; Li, Z.N.; Lu, Y.; Brett, D.J.L.; Guo, Z.X. An efficient carbon-based ORR catalyst from low temperature etching of ZIF-67 with ultra-small cobalt nanoparticles and high yield. *J. Mater. Chem. A*, **2019**, *7*, 3544–3551.
11. He, H.; Lei, Y.X.; Liu, S.; Thumavichai, K.; Zhu, Y.Q.; Wang, N.N. ZIF-67-derived Co nanoparticles embedded in N-doped porous carbon composite interconnected by MWCNTs as highly efficient ORR electrocatalysts for a flexible direct formate fuel cell. *Chem. Eng. J.* **2022**, *432*, 134192.
12. Li, S.A.; Feng, C.; Xie, Y.H.; Guo, C.Y.; Zhang, L.G.; Wang, J.D. Synthesis of nitrogen-rich porous carbon nanotubes coated Co nanomaterials as efficient ORR electrocatalysts via MOFs as precursor. *J. Alloys Compd.* **2022**, *911*, 165060.
13. Liu, Z.F.; Ye, D.D.; Zhu, X.; Wang, S.L.; Zou, Y.N.; Lan, L.H.; Chen, R.; Yang, Y.; Liao, Q. Tunable active-sites of Co–nanoparticles encapsulated in carbon nanofiber as high performance bifunctional OER/ORR electrocatalyst. *J. Colloid Interface Sci.* **2023**, *630*, 140–149.
14. Chu, Y.; Jiang, Q.L.; Chang, L.Y.; Jin, Y.H.; Wang, R.Z. Cobalt nanoparticles embedded in nitrogen-doped porous carbon derived the electrodeposited ZnCo-ZIF for high-performance ORR electrocatalysts. *J. Electroanal. Chem.* **2023**, *928*, 117041.
